# Supplementary material
Source: PubMed Central journal article supplement (PMC4518464)
Supplement: NIHMS697382-supplement-1.pdf [file NIHMS697382-supplement-1.pdf]

SUPPLEMENTARY INFORMATION

miR-218 is Essential to Establish Motor Neuron Fate as a Downstream Effector of Isl1-Lhx3

Karen P. Thiebes, Heejin Nam, Xiaolu A. Cambronne, Rongkun Shen, Stacey M. Glasgow, Hyong-Ho Cho, Ji-sun Kwon, Richard H. Goodman, Jae W. Lee, Seunghee Lee, & Soo-Kyung Lee

Supplementary Figures

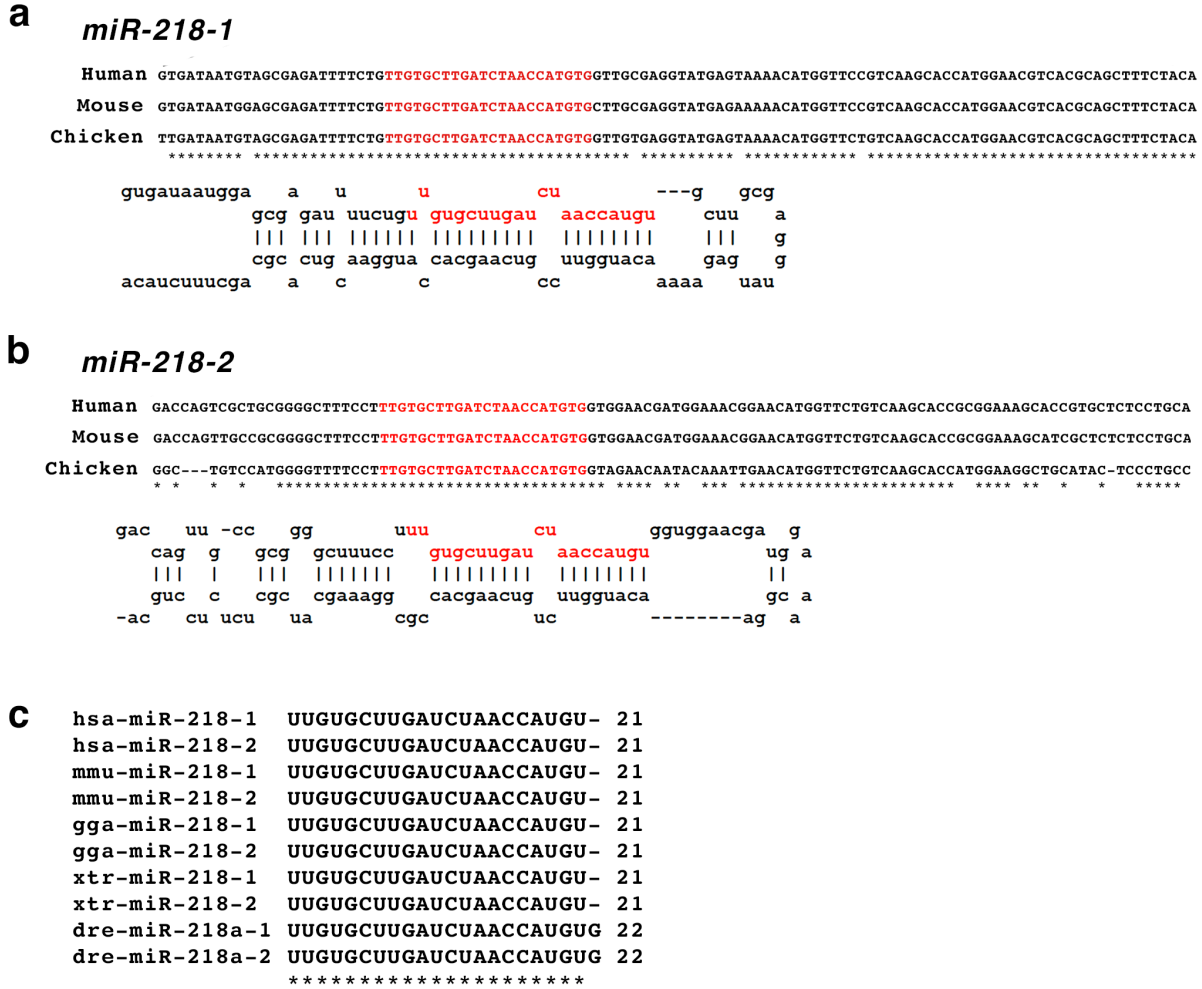

Supplementary Figure 1. miR-218 is an evolutionarily conserved miRNA produced from *miR-218-1* and *miR-218-2* genes.

(a-b) *miR-218-1* and *miR-218-2* genes and hairpin structures in human, mouse and chicken genome.  
 (c) Sequence alignment shows that the mature miR-218 sequences are highly conserved among multiple species.

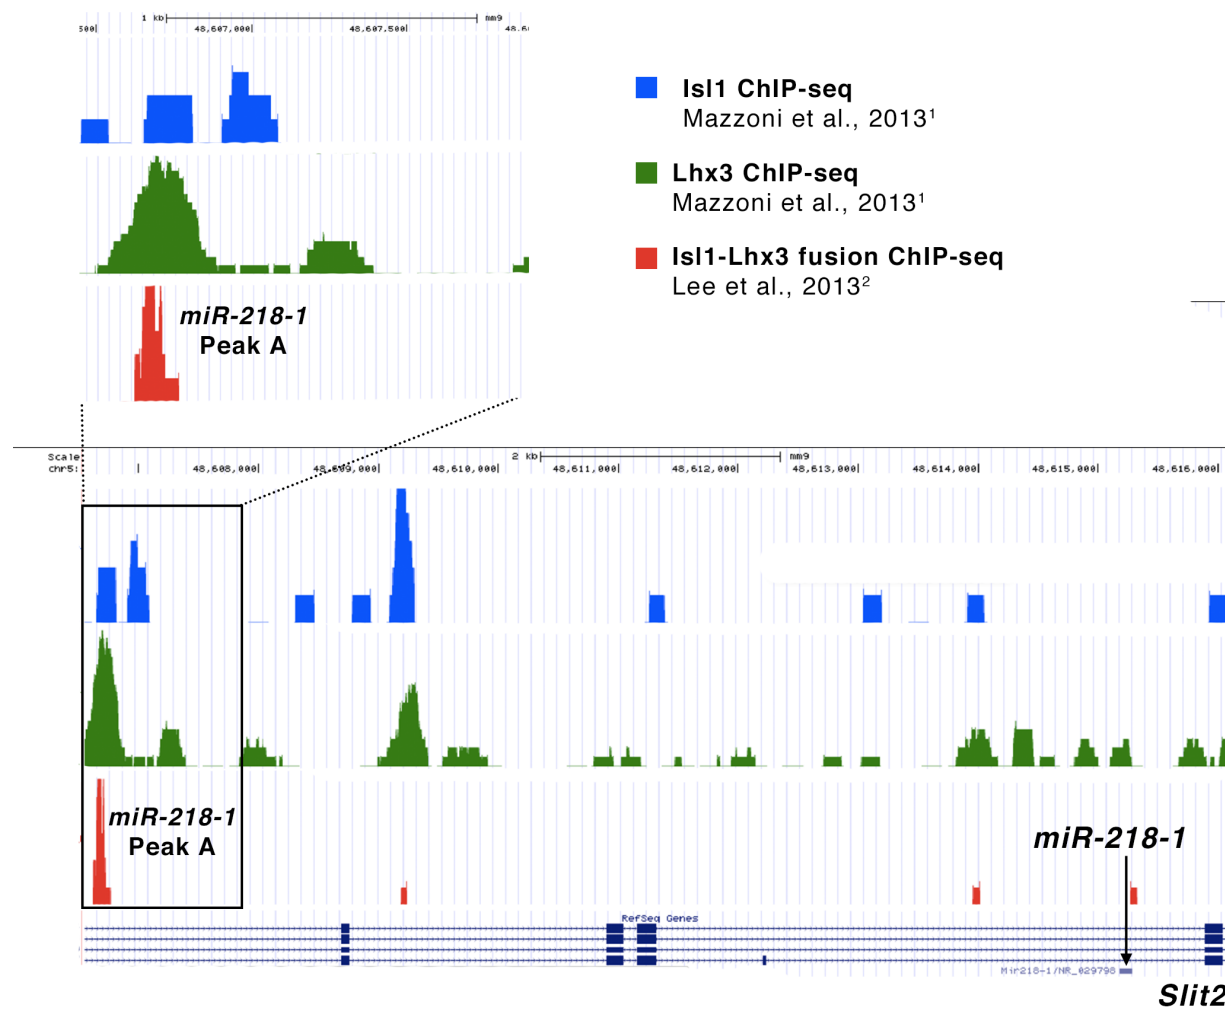

**Supplementary Figure 2. ChIP-seq Peak in *miR-218-1/Slit2* locus**

Isl1-Lhx3-bound ChIP-seq peak was identified near *miR-218-1* within the intron of *Slit2* from three independent ChIP-seq experiments<sup>1,2</sup>.

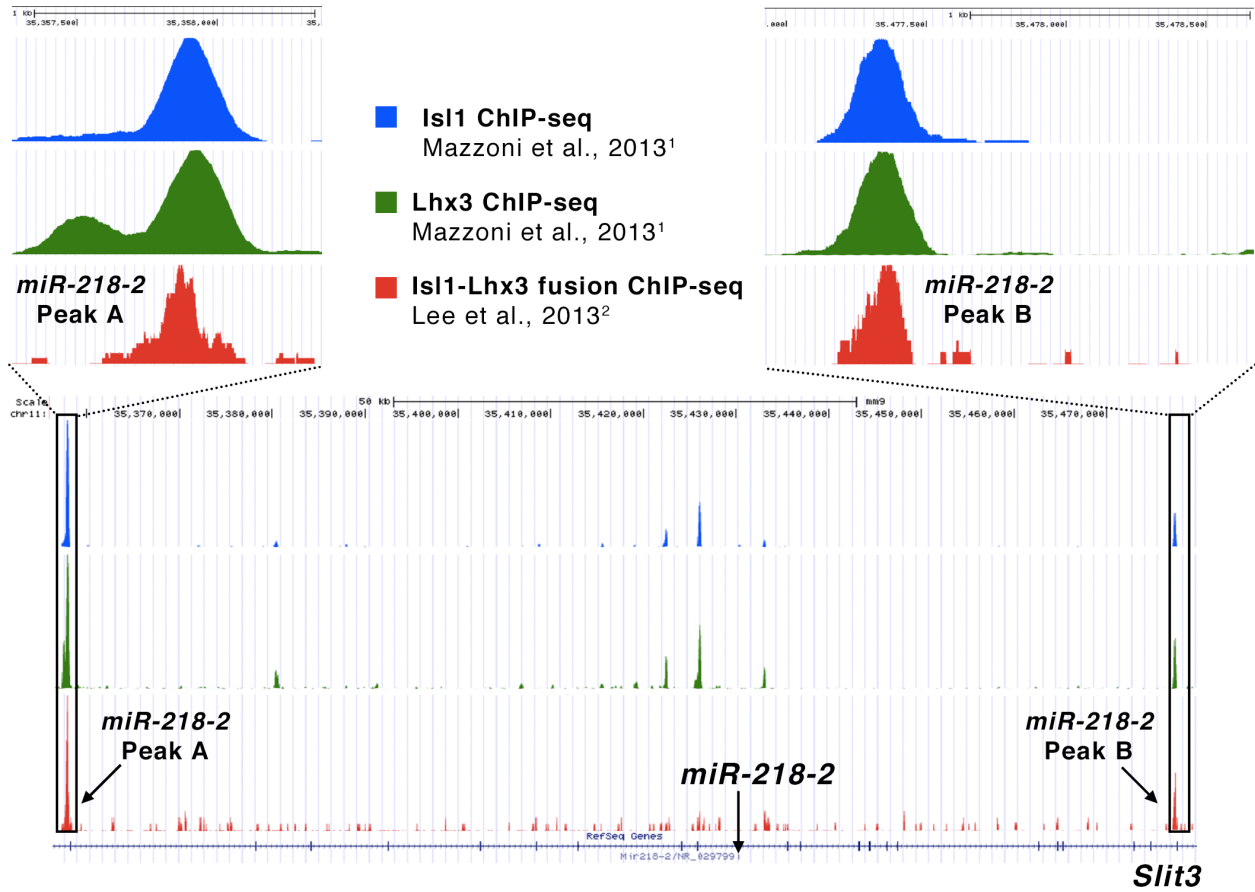

**Supplementary Figure 3. ChIP-seq Peaks in *miR-218-2/Slit3* locus**

IsI1-Lhx3-bound ChIP-seq peaks were identified near *miR-218-2* within the intron of *Slit3* from three independent ChIP-seq experiments<sup>1,2</sup>.

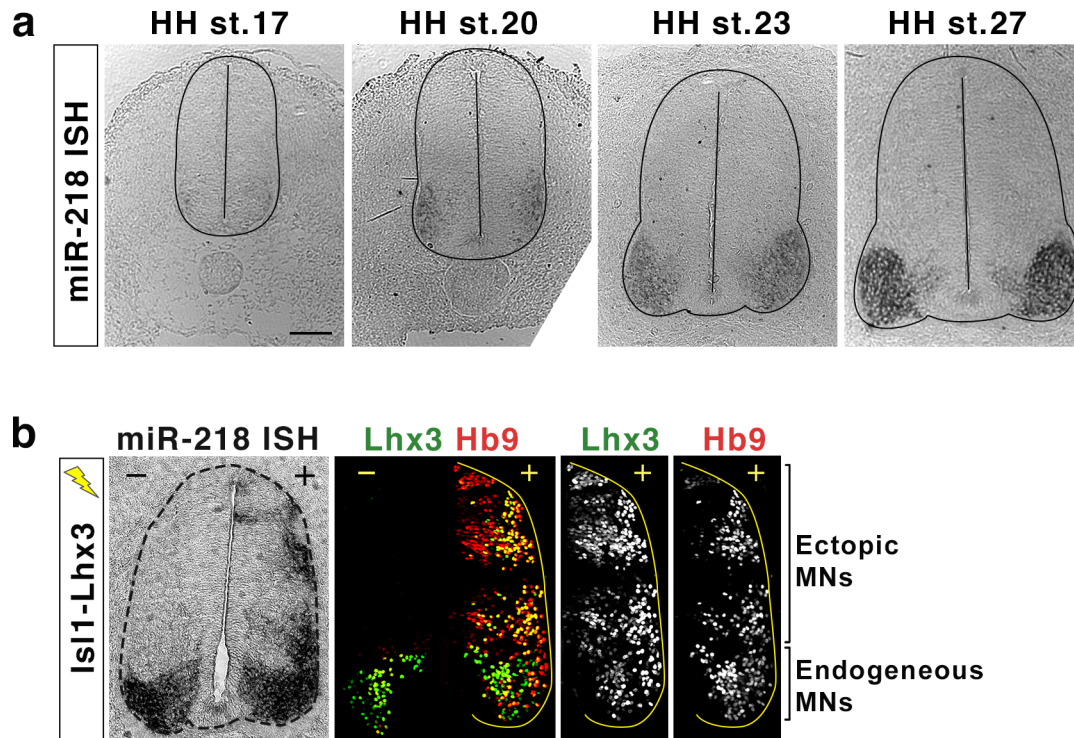

**Supplementary Figure 4. miR-218 is upregulated by Is11-Lhx3 during motor neuron specification.**

**(a)** *In situ* hybridization (ISH) analyses in the developing chick spinal cord show that miR-218 expression begins at the onset of motor neuron differentiation and specifically expressed in motor neurons.

**(b)** *In situ* hybridization and immunohistochemical analyses on sequential sections of a chick embryo electroporated with Is11-Lhx3. Misexpression of Is11-Lhx3 triggers upregulation of miR-218 and the ectopic formation of Hb9<sup>+</sup> motor neurons (MNs) in dorsal spinal cord. +, electroporated side; -, unelectroporated control side.

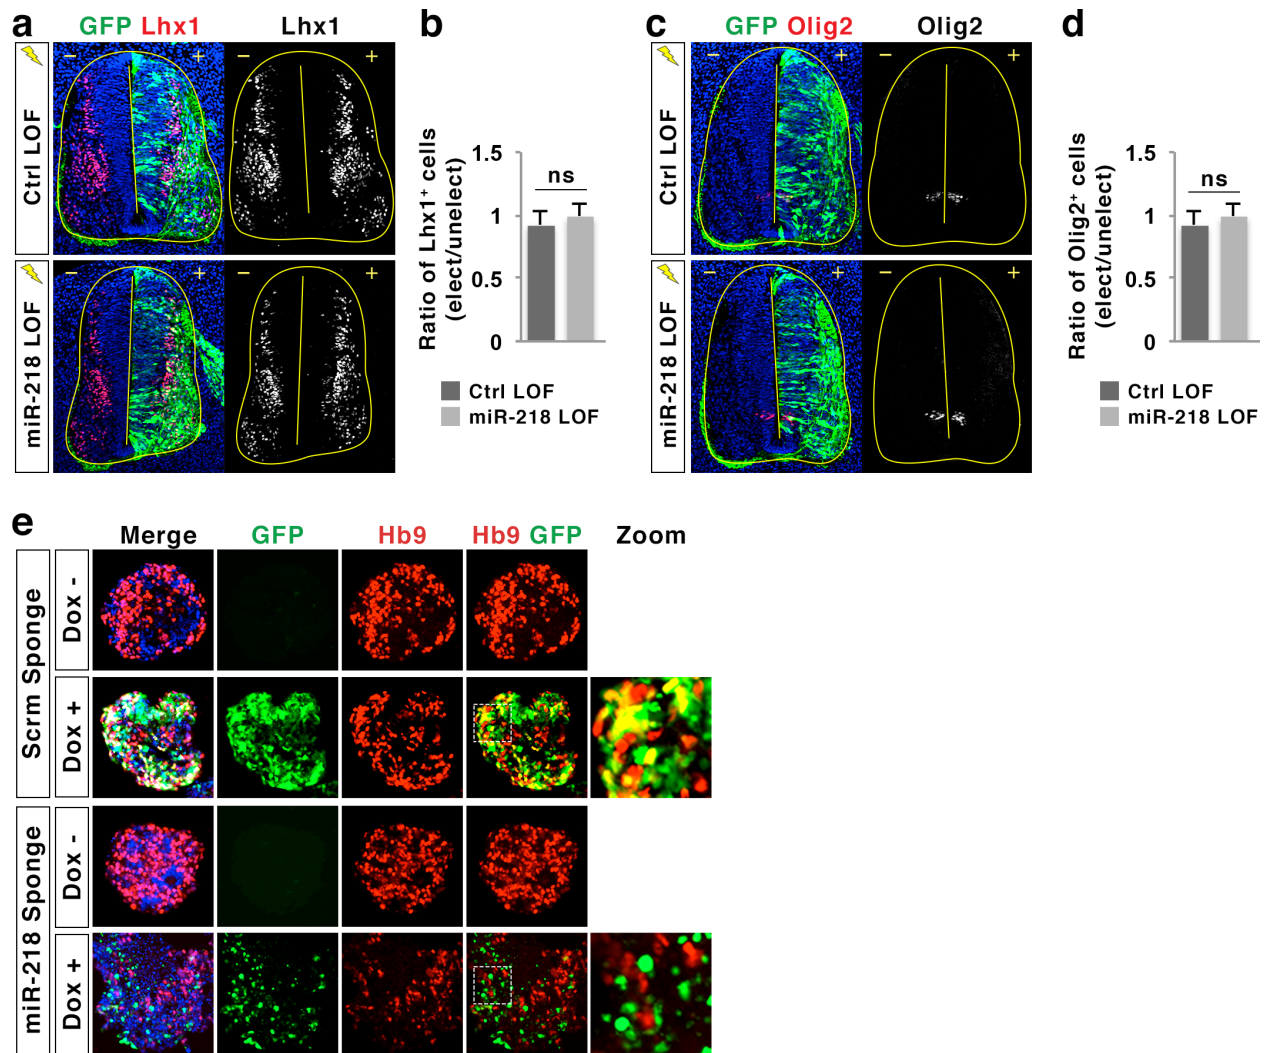

**Supplementary Figure 5. miR-218 is required for efficient differentiation of motor neurons.**

(a,c) Loss of function (LOF) analyses in chicks electroporated with control (Ctrl) LOF conditions (scrambled sponge inhibitor, 2'Ome-inhibitor control, and CMV-GFP reporter) and miR-218 LOF conditions (miR-218 sponge inhibitor, miR-218 2'Ome-inhibitor, and CMV-GFP reporter). Lhx1 antibody labels interneurons and LMC motor neurons, while Olig2 antibody labels motor neuron progenitors in immunohistochemical analyses. +, electroporated side; -, unelectroporated control side.

(b,d) The effect of LOF conditions was quantified by the ratio of Lhx1<sup>+</sup> cells or Olig2<sup>+</sup> cells on the electroporated (elect) side over the unelectroporated (unelect) side. ns = not significant in two-tailed Student's t-test; n = 12-13 embryos for (b) Lhx1 counts and n = 6-8 embryos for (d) Olig2 counts.

(e) Immunohistochemical analyses in Dox-inducible sponge ESC-derived motor neurons at differentiation day 6. Hb9 antibody labels motor neurons, and GFP labels the cells in which the expression of scramble (Scrm) or miR-218 sponge inhibitor is induced by Dox. miR-218 sponge inhibitor, but not scramble inhibitor, strongly inhibited motor neuron differentiation. Zoom shows the magnified view of the areas marked by dotted lines in Hb9/GFP merged images.

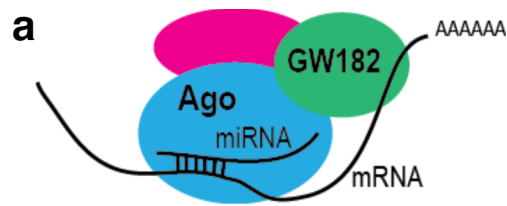

**b**

| Published miR-218 Target | RISC-trap Fold Change (218 vs. 181) | References                                                                |
|--------------------------|-------------------------------------|---------------------------------------------------------------------------|
| <b>RICTOR</b>            | 17.83                               | Uesugi et al., 2011 <sup>3</sup> ; Venkataraman et al., 2013 <sup>4</sup> |
| <b>ONECUT2</b>           | 17.5                                | Simion et al., 2010 <sup>5</sup>                                          |
| <b>GLCE</b>              | 14.41                               | Prudnikova et al., 2012 <sup>6</sup>                                      |
| <b>LEF1</b>              | 8.41                                | Liu et al., 2012 <sup>7</sup> ; Tu et al., 2013 <sup>8</sup>              |
| <b>CDK6</b>              | 6.68                                | Venkataraman et al., 2013 <sup>4</sup>                                    |
| <b>GJA1</b>              | 5.39                                | Alajez et al., 2011 <sup>9</sup>                                          |
| <b>LASP1</b>             | 5.23                                | Chiyomaru et al., 2012 <sup>10</sup>                                      |
| <b>PIK3C2A</b>           | 5.12                                | Mathew et al., 2014 <sup>11</sup>                                         |
| <b>Robo2</b>             | 5.09                                | Fish et al., 2011 <sup>12</sup>                                           |
| <b>Robo1</b>             | 4.27                                | Fish et al., 2011 <sup>12</sup> ; Alajez et al., 2011 <sup>9</sup>        |
| <b>Cav2</b>              | 3.52                                | Yamasaki et al., 2013 <sup>13</sup>                                       |
| <b>Birc5</b>             | 2.5                                 | Alajez et al., 2011 <sup>9</sup>                                          |
| <b>IKBKB</b>             | 2.18                                | Song et al., 2010 <sup>14</sup>                                           |
| <b>BMI1</b>              | 2.11                                | Tu et al., 2013 <sup>8</sup> ; Venkataraman et al., 2013 <sup>4</sup>     |
| <b>HMGB1</b>             | 1.79                                | Mathew et al., 2014 <sup>11</sup>                                         |
| <b>DTL</b>               | 1.72                                | Liu et al., 2013 <sup>15</sup>                                            |

**Supplementary Figure 6. miR-218 RISC-trap Screen identified previously published miR-218 targets as direct target mRNAs for miR-218.**

(a) Illustration of miRNA-induced silencing complex (miRISC).

(b) Previously published miR-218 targets that were identified in our miR-218 RISC-trap screen. RISC-trap fold changes for miR-218 vs. miR-181 and references are shown. All targets in this table were significantly enriched in the miR-218 vs. miR-181 RISC-trap analyses with  $p < 0.05$ .

| <b>miR-218 RISC-trap Target mRNA</b> | <b>Spinal Cord Expression</b>       | <b>Function</b>                                                                     | <b>Reference</b>                                                                                              |
|--------------------------------------|-------------------------------------|-------------------------------------------------------------------------------------|---------------------------------------------------------------------------------------------------------------|
| <b>TEAD1</b>                         | Progenitor Zone                     | <b>Transcription Factor</b><br>Neural progenitor proliferation                      | Cao et al., 2008 <sup>16</sup>                                                                                |
| <b>SLC6A1 (GAT1)</b>                 | Interneurons                        | <b>GABA Transporter</b><br>GABAergic interneuron neurotransmission                  | Jursky et al., 1999 <sup>17</sup><br>Chen et al., 2004 <sup>18</sup>                                          |
| <b>BCL11A (Ctip1)</b>                | Interneurons                        | <b>Transcription Factor</b><br>Neuronal morphogenesis and sensory circuit formation | Li et al., 2006 <sup>19</sup><br>John et al., 2012 <sup>20</sup>                                              |
| <b>Lhx1</b>                          | Interneurons                        | <b>Transcription Factor</b><br>Inhibitory interneuron differentiation               | Pillai et al., 2007 <sup>21</sup><br>Huang et al., 2008 <sup>22</sup><br>Brohl et al., 2008 <sup>23</sup>     |
| <b>FoxP2</b>                         | Progenitor Zone<br>V1 Interneurons  | <b>Transcription Factor</b><br>Neurogenesis                                         | Morikawa et al., 2009 <sup>24</sup><br>Rousso et al., 2012 <sup>25</sup>                                      |
| <b>Prdm13</b>                        | Interneurons                        | <b>Histone Methyltransferase</b><br>Inhibitory interneuron differentiation          | Kinameri et al., 2008 <sup>26</sup><br>Chang et al., 2013 <sup>27</sup><br>Hanotel et al., 2014 <sup>28</sup> |
| <b>Sox21</b>                         | Progenitor Zone<br>V2a Interneurons | <b>Transcription Factor</b><br>Neurogenesis                                         | Uchikawa et al., 1999 <sup>29</sup><br>Sandberg et al., 2005 <sup>30</sup>                                    |
| <b>Pou4f1 (Brn3a)</b>                | Interneurons<br>Dorsal Root Ganglia | <b>Transcription Factor</b><br>Sensory and interneuron differentiation              | Müller et al., 2002 <sup>31</sup><br>Eng et al., 2007 <sup>32</sup><br>Zou et al., 2012 <sup>33</sup>         |
| <b>BMPR1b</b>                        | Interneurons                        | <b>Transcription Factor</b><br>Dorsal interneuron differentiation                   | Wine-Lee et al., 2004 <sup>34</sup>                                                                           |

**Supplementary Figure 7. Expression and function of the selected miR-218 targets in spinal cord development.**

A subset of miR-218 targets identified in the RISC-trap screen play important roles in spinal cord development. Tead1, FoxP2 and Sox21 are known to be important for neurogenesis, while Lhx1, BCL11A, SLC6A1, Foxp2, Pou4f1, Prdm13, Sox21, and BMPR1b play roles for the differentiation and function of spinal interneurons.

- UTR (untranslated region)
- ORF (open reading frame)
- miR-218 MRE (miRNA response element)
- \* miR-218 MRE used for 3'UTR luciferase and sensor constructs

**a Tead1**

Human mRNA NM\_021961, 9433 bp

218 MREs: 10

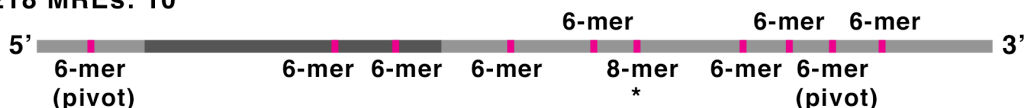

**b SLC6A1**

Human mRNA NM\_003042, 4494 bp

218 MREs: 4

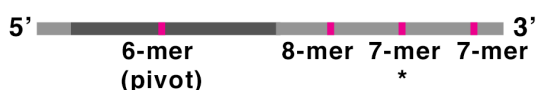

**c BLC11A**

Human mRNA NM\_022893, 5946 bp

218 MREs: 6

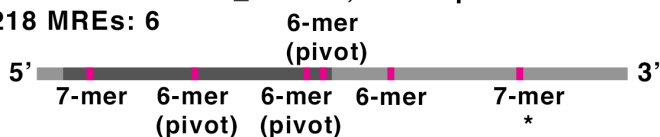

**d Lhx1**

Human mRNA NM\_005568.3, 3431 bp

218 MREs: 2

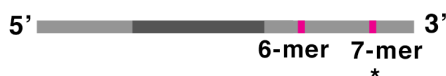

**e FoxP2**

Human mRNA NM\_148898.3, 6448 bp

218 MREs: 4

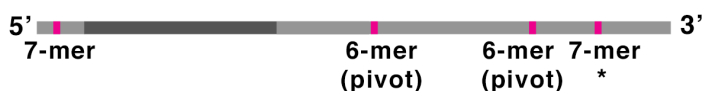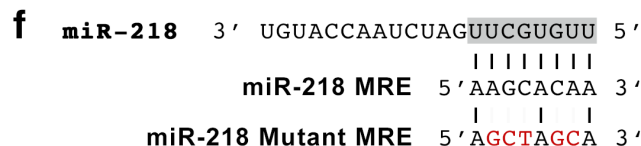

**Supplementary Figure 8. miR-218 MRE Distribution on miR-218 target mRNAs.**

(a-e) Illustrations showing the relative distribution of miR-218 MREs on the selected miR-218 targets. The highest conserved miR-218 MREs in 3'UTR of each gene, marked by asterisk, were selected to generate the 3'UTR sensor constructs. The 6-mer pivot MREs contain 6 perfect matching nucleotides and either a C or G bulge in MRE positions 5-6<sup>35</sup>.

(f) Mutation was introduced to the miR-218 MRE as indicated for miR-218 MRE mutant luciferase reporters in Figure 5c.



- a**
- UTR (untranslated region)
  - ORF (open reading frame)
  - miR-218 MRE (miRNA response element)
  - \* Highest conserved 3'UTR miR-218 MRE

**Pax2 Human mRNA NM\_003990, 4104 bp**  
**218 MREs: 3**

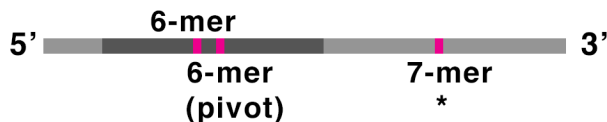

**b**

```

miR-218 3' UGUACCAAUCUAGUUCGUGUU 5'
                | | | | | | | |
Pax2 hsa 5' AGCUACACGCCCAUAAAAGCACAGC 3'
                | | | | | | | |
Pax2 mmu 5' AGCUACAUGCCCACUAAAAGCACAGC 3'
                | | | | | | | |
Pax2 gga 5' AACACUGUGUUCAAUAAAAGCACAGC 3'
  
```

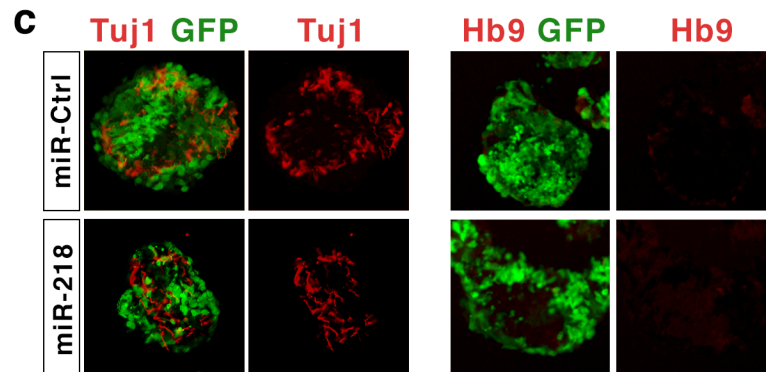

**Supplementary Figure 9. Pax2 is a potential miR-218 target and control experiments for miR-218 and miR-Control ESCs**

(a) Illustration showing the relative distribution of miR-218 MREs on human Pax2 mRNA. The highest conserved miR-218 MRE in 3'UTR was identified by TargetScan. The 6-mer pivot MREs contain 6 perfect matching nucleotides and either a C or G bulge in MRE positions 5-6<sup>35</sup>.

(b) The miR-218 MRE in 3'UTR of the *Pax2* gene is highly conserved among multiple species.

(c) Immunohistochemical analyses of miR-218 and miR-Control (miR-Ctrl) ESCs at differentiation day 6. There was no significant difference in the number of Tuj1<sup>+</sup> neurons between miR-218 and miR-Control (miR-Ctrl) ESCs. Hb9<sup>+</sup> motor neurons were not formed in either miR-218 or miR-Control ESCs. Weakly Hb9<sup>+</sup> cells at the edge of embryoid bodies of miR-Control ESCs are not neurons and appear to represent Hb9 expression in primitive gut tube.

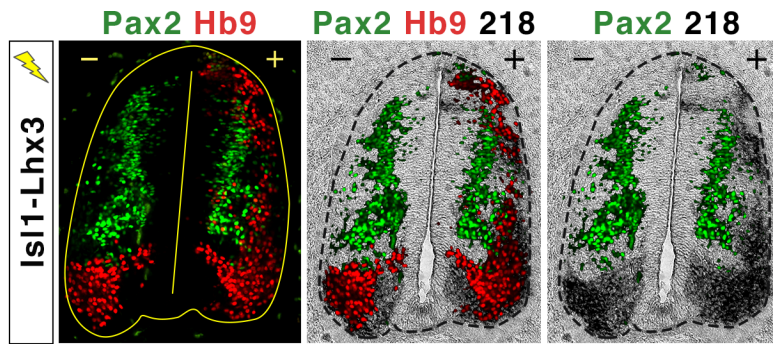

**Supplementary Figure 10. Isl1-Lhx3 directs a complete fate transition from interneurons to motor neurons in the dorsal spinal cord.**

*In situ* hybridization for miR-218 and immunohistochemical analyses with Pax2 and Hb9 antibodies on sequential sections of chick embryos electroporated with Isl1-Lhx3. Hb9<sup>+</sup> motor neurons are generated at the expense of Pax2<sup>+</sup> interneurons. The overlay of Pax2, Hb9 and miR-218 shows that ectopic Hb9<sup>+</sup> motor neurons express miR-218, while lacking Pax2 expression. +, electroporated side; -, unelectroporated control side.

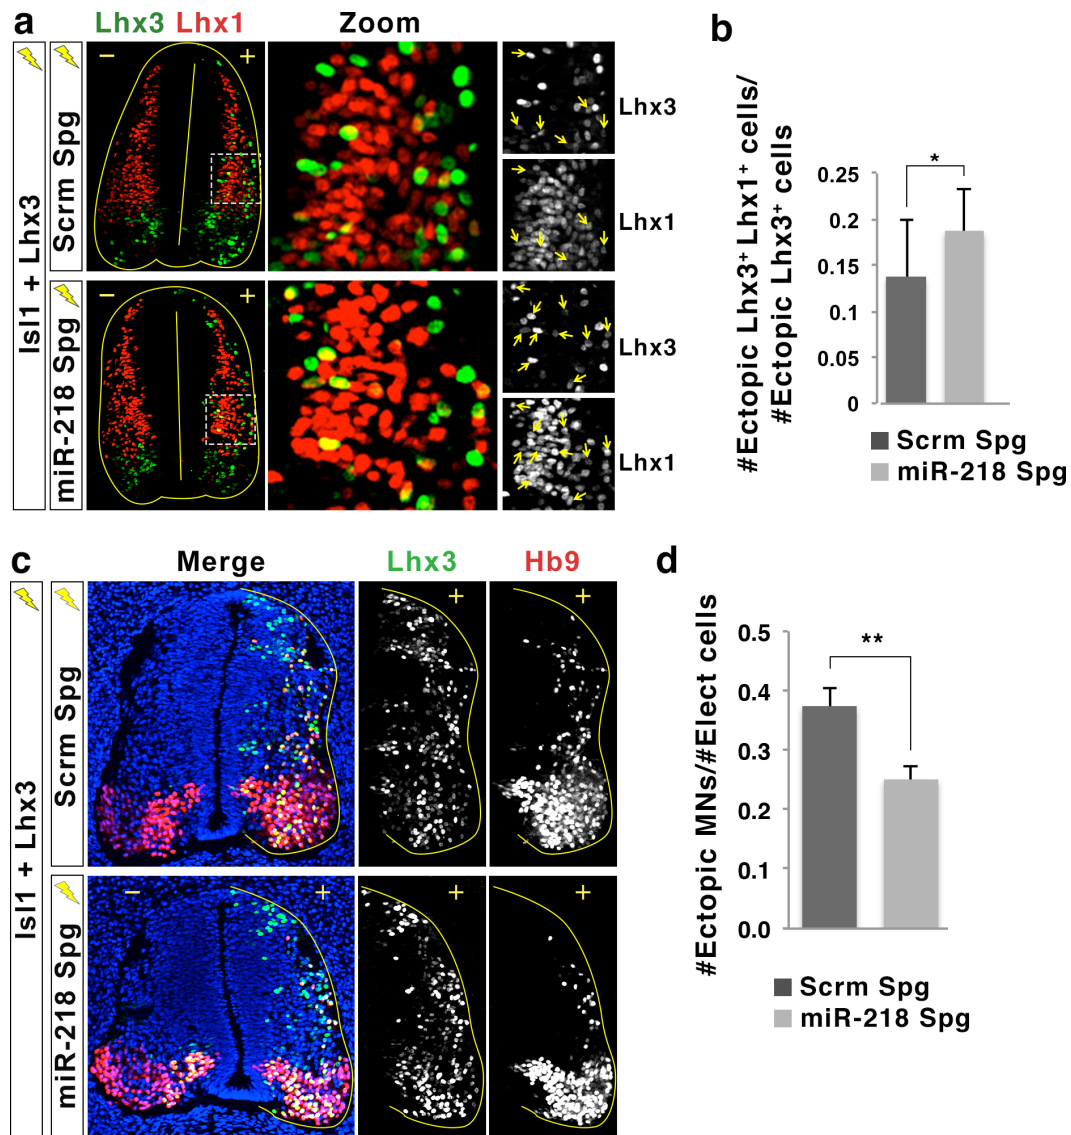

**Supplementary Figure 11. Interneuron inhibitory action of miR-218, a downstream target of Isl1-Lhx3, is needed for Isl1-Lhx3 to drive efficient motor neuron generation.**

(a-d) Immunohistochemical analyses of chick embryos electroporated with Isl1, Lhx3 and either miR-218 sponge inhibitor (miR-218 Spg) or scrambled sponge inhibitor (Scrm Spg). +, electroporated side; -, unelectroporated control side.

(a,b) miR-218 sponge inhibitor significantly increased the proportion of Lhx1-expressing cells among Isl1/Lhx3-electroporated cells, compared to scrambled sponge inhibitor. Zoom panels and arrows show relative prevalence of ectopic Lhx3 and Lhx1 double positive cells. (b) The effect of miR-218 inhibitor on ectopic Lhx3 and Lhx1 double positive cells in (a) was quantified by the ratio of Lhx3 and Lhx1 double positive cells over the number of Lhx3-expressing electroporated cells. Error bars represent the standard error of the mean. \* $p < 0.05$ , in two-tailed Student's t-test.  $n = 5-6$  embryos.

(c,d) miR-218 sponge inhibitor substantially reduced the efficiency of motor neuron production by the co-expression of Isl1 and Lhx3, compared to scrambled sponge inhibitor. (d) The effect of miR-218 inhibitor on ectopic motor neuron differentiation in (c) was quantified by the ratio of ectopic Hb9<sup>+</sup> motor neurons (MNs) over Lhx3-expressing transfected cells (Elect cells). Error bars represent the standard error of the mean. \*\* $p < 0.005$ , in two-tailed Student's t-test.  $n = 5-6$  embryos.

| <b>ChIP qPCR Primers</b>         | <b>Fwd Oligo Sequence (5' -&gt; 3')</b>                                              | <b>Rev Oligo Sequence (5' -&gt; 3')</b>                                              |
|----------------------------------|--------------------------------------------------------------------------------------|--------------------------------------------------------------------------------------|
| <b>miR-218-1 peak A</b>          | ATATAAAACCCATTAATCCAAGCC                                                             | AAGGGTAAATCTAAGCTTCAAGGT                                                             |
| <b>miR-218-2 peak A</b>          | AGAGCAGTGACCTCCAATGATTTA                                                             | TGCTCTGTCTCTTCTCTCTGACTG                                                             |
| <b>miR-218-2 peak B</b>          | GCTATTCTATGGGAAATGGCTTGG                                                             | GCTGTACATCCTTCTGGAGAGAGT                                                             |
| <b>RISC-trap qPCR Primers</b>    | <b>Fwd Oligo Sequence (5' -&gt; 3')</b>                                              | <b>Rev Oligo Sequence (5' -&gt; 3')</b>                                              |
| <b>CycA</b>                      | GATGCCAGGACCTGTATGCT                                                                 | GTCTCCTTCGAGCTGTTTGC                                                                 |
| <b>Tead1</b>                     | CACCTGCATCCTCTTGTCTCA                                                                | GAGAAGCCCAC'TGGGATGAC                                                                |
| <b>SLC6A1</b>                    | TGTTCTTCCGTGGAGTGACG                                                                 | GACGAATCCTGCGAACATGC                                                                 |
| <b>BCL11A</b>                    | GGGAGCACGCCCCATATTAG                                                                 | GCACAGGCATAGTTGCACAG                                                                 |
| <b>Lhx1</b>                      | TCATCCCCTGGGCTCTACTT                                                                 | GGTACCGAAACACCGGAAGA                                                                 |
| <b>FoxP2</b>                     | AGTGCAAGACGAGACAGCTC                                                                 | CGGTCATCCAATGCGTGTTC                                                                 |
| <b>GLCE</b>                      | CGTGCCCTTAACAATGTGGCTGTCC                                                            | TGCTGTTGCAATGTGGAAGGCAGT                                                             |
| <b>RFT1</b>                      | TCAGAAGCAGGAGGACGTTG                                                                 | AGCATGGTCCCTCCGTAGAT                                                                 |
| <b>MRE Sensor Oligos</b>         | <b>Fwd Oligo Sequence (5' -&gt; 3')</b>                                              | <b>Rev Oligo Sequence (5' -&gt; 3')</b>                                              |
| <b>miR-218 MRE</b>               | CGCGTACATGGTTAGATCAAGCACAAAG                                                         | CGCGCTTGTGCTTGATCTAACCATGTA                                                          |
| <b>miR-218* MRE</b>              | CGCGCTTGTGCTTGATCTAACCATGTA                                                          | CGCGCAACATGGTTAGATCAAGCACAAA                                                         |
| <b>Sensor Primers</b>            | <b>Fwd Oligo Sequence (5' -&gt; 3')</b>                                              | <b>Rev Oligo Sequence (5' -&gt; 3')</b>                                              |
| <b>Tead1</b>                     | GCACGCGTGGGAGAGCTGTCTGGTTC                                                           | GGCGCGCGGCTCTGGGAAGGCTTCTTT                                                          |
| <b>SLC6A1</b>                    | GCACGCGTGTGCCCTGTAGCTCCTTAGC                                                         | GGCGCGCGGGAAGTGGGACCATGAGAC                                                          |
| <b>BCL11A</b>                    | GCACGCGTCAAAGCCCTGGAACGCAAT                                                          | GGCGCGCACAGGCAGAGTCAAGTGCT                                                           |
| <b>Lhx1</b>                      | ACGCGTCAGATTTGCAGGGCTTTCGG                                                           | GCGCGCTGCACTGGAGGTCACACAAG                                                           |
| <b>FoxP2</b>                     | ACGCGTTTTCTGCATCTGCTTTGCGT                                                           | GCGCGCACAACTGTGCCACGAATCCA                                                           |
| <b>Ctrl</b>                      | GCACGCGTTAACTGAGAGGGGACATACAAAGA                                                     | GGCGCGCTTGCCAACACCATCATTCCTTCGA                                                      |
| <b>Luciferase Primers</b>        | <b>Fwd Oligo Sequence (5' -&gt; 3')</b>                                              | <b>Rev Oligo Sequence (5' -&gt; 3')</b>                                              |
| <b>Tead1</b>                     | GTCTAGAGGGAGAGCTGTCTGGTTC                                                            | GACTAGTGGCTCTGGGAAGGCTTCTTT                                                          |
| <b>SLC6A1</b>                    | GTCTAGAGTGCCCTGTAGCTCCTTAGC                                                          | GACTAGTGGGAAGTGGGACCATGAGAC                                                          |
| <b>BCL11A</b>                    | GTCTAGACAAAAGCCCTGGAACGCAAT                                                          | GACTAGTACAGGCAGAGTCAAGTGCT                                                           |
| <b>Lhx1</b>                      | GTCTAGACAGATTTGCAGGGCTTTCGG                                                          | GACTAGTTGCACTGGAGGTCACACAAG                                                          |
| <b>FoxP2</b>                     | GTCTAGATTTCTGCATCTGCTTTGCGT                                                          | GACTAGTACAACCTGTGCCACGAATCCA                                                         |
| <b>Luciferase Mutant Primers</b> | <b>Fwd Oligo Sequence (5' -&gt; 3')<br/>(internal primer, overlap extension PCR)</b> | <b>Rev Oligo Sequence (5' -&gt; 3')<br/>(internal primer, overlap extension PCR)</b> |
| <b>Tead1</b>                     | TTCCAAGCTAGCAAAATACTGG                                                               | TTTTGCTAGCTTGGAAGGA                                                                  |
| <b>SLC6A1</b>                    | ACAATATGCTAGCTAATATTTCTGAGG                                                          | GAATATTAGCTAGCATATTGTAGAGAAA                                                         |
| <b>BCL11A</b>                    | TATAGCTAGCACGTGGTACTATTTGC                                                           | CGTGCTAGCTATAAATCATATTATTTTC                                                         |
| <b>Lhx1</b>                      | GTATTGCTAGCTTAATTATTTCTATTTGG                                                        | TAATTAAGCTAGCAATACTGTAAAGGTG                                                         |
| <b>FoxP2</b>                     | TGTTGCTAGCTCAGTTTAAAATTT                                                             | CTGAGCTAGCAACATCTGTTTATG                                                             |

Supplementary Table 1. DNA Oligos



the script (20/255). Next, the program applies the same area selection mask to the GFP channel and measures pixel intensity. The program then calculates the average GFP divided by RFP pixel intensity ratio and provides the output with sample number, area measured, GFP/RFP pixel intensity, as well as minimum and maximum GFP/RFP pixel intensity ratios. The final text in the script closes the remaining open images. The script listed below can be copied and saved as a standard .txt file to be used for image GFP/RFP pixel intensity analysis.

```

//CH1 = RFP, CH2 = GFP, CH3
= DAPI
//Create selection in DAPI
channel before use of this
//8-bit conversion
run("8-bit");
//Grab Titles/Slice Names
parent=getTitle();
setSlice(1);
setMetadata("Label",
"channel1");
imc1=getInfo("slice.label");
setSlice(2);
setMetadata("Label",
"channel2");
imc2=getInfo("slice.label");
setSlice(3);
setMetadata("Label",
"channel3");
imc3=getInfo("slice.label");
//Clear Data Outside DAPI
region selection
run("Create Mask");
mask1=getTitle();
imageCalculator("AND stack",
parent,mask1);
selectImage(mask1);
run("Close");
selectImage(parent);

//run("Clear Outside", "stack");
//Create mask from threshold of
RFP slice
run("Select None");

setSlice(1);
setThreshold(20, 255);
run("Create Selection");
slxn=getInfo("selection.name")
run("Create Mask");
mask2=getTitle();
//Mask image stack with RFP
slice mask
imageCalculator("AND stack",
parent,mask2);
selectImage(parent);
resetThreshold();
run("Select None");
//Delete DAPI channel
setSlice(3);
run("Delete Slice");
//Split channels
run("Stack to Images");
selectImage(imc1);
//divide GFP by RFP
imageCalculator("Divide create
32-bit", imc2,imc1);
quotient=getTitle();
selectImage(quotient);

run("Measure");
//CLOSE REMAINING
IMAGES
selectImage(mask2);
run("Close");
selectImage(imc1);
run("Close");
selectImage(imc2);
run("Close");
selectImage(quotient);
run("Close");

//END OF SCRIPT. SCRAPS
BELOW

//imc1=getInfo("slice.label");
//print(imc1);
//run("Stack to Images");
//selectimage(imc1);
//joe=getTitle();
//print(joe);
//imid1 = getImageID();
//selectimage();
//run("Create Mask");
//run("Stack to Images");
//setSlice(4);
//run("Delete Slice

```

## Supplementary References

1. Mazzoni, E. O. *et al.* Synergistic binding of transcription factors to cell-specific enhancers programs motor neuron identity. *Nature Neuroscience* **16**, 1219–1227 (2013).
2. Lee, S. *et al.* STAT3 promotes motor neuron differentiation by collaborating with motor neuron-specific LIM complex (supp). *PNAS* **110**, 11445–11450 (2013).
3. Uesugi, A. *et al.* The Tumor Suppressive MicroRNA miR-218 Targets the mTOR Component Rictor and Inhibits AKT Phosphorylation in Oral Cancer. *Cancer Research* **71**, 5765–5778 (2011).
4. Venkataraman, S. *et al.* MicroRNA 218 Acts as a Tumor Suppressor by Targeting Multiple Cancer Phenotype-associated Genes in Medulloblastoma. *Journal of Biological Chemistry* **288**, 1918–1928 (2013).
5. Simion, A. *et al.* MiR-495 and miR-218 regulate the expression of the Onecut transcription factors HNF-6 and OC-2. *Biochemical and Biophysical Research Communications* **391**, 293–298 (2010).
6. Prudnikova, T. Y. *et al.* miRNA-218 contributes to the regulation of D-glucuronyl C5-epimerase expression in normal and tumor breast tissues. *epigenetics* **7**, 1109–1114 (2012).
7. Liu, Y. *et al.* MiR-218 reverses high invasiveness of glioblastoma cells by targeting the oncogenic transcription factor LEF1. *Oncol. Rep.* **28**, 1013–1021 (2012).
8. Tu, Y. *et al.* MicroRNA-218 Inhibits Glioma Invasion, Migration, Proliferation, and Cancer Stem-like Cell Self-Renewal by Targeting the Polycomb Group Gene Bmi1. *Cancer Research* **73**, 6046–6055 (2013).
9. Alajez, N. M. *et al.* miR-218 Suppresses Nasopharyngeal Cancer Progression through Downregulation of Survivin and the SLIT2-ROBO1 Pathway. *Cancer Research* **71**, 2381–2391 (2011).
10. Chiyomaru, T. *et al.* Functional role of LASP1 in cell viability and its regulation by microRNAs in bladder cancer. *URO* **30**, 434–443 (2012).
11. Mathew, L. K., Skuli, N., Mucaj, V. & Lee, S. S. miR-218 opposes a critical RTK-HIF pathway in mesenchymal glioblastoma. in (2014). doi:10.1073/pnas.1314341111/-/DCSupplemental
12. Fish, J. E. *et al.* A Slit/miR-218/Robo regulatory loop is required during heart tube formation in zebrafish. *Development* **138**, 1409–1419 (2011).
13. Yamasaki, T. *et al.* MicroRNA-218 Inhibits Cell Migration and Invasion in Renal Cell Carcinoma through Targeting Caveolin-2 Involved in Focal Adhesion Pathway. *JURO* **190**, 1059–1068 (2013).
14. Song, L. *et al.* miR-218 inhibits the invasive ability of glioma cells by direct downregulation of IKK- $\beta$ . *Biochemical and Biophysical Research Communications* **402**, 135–140 (2010).
15. Liu, Y. *et al.* Neuroscience Letters. *Neuroscience Letters* **546**, 36–41 (2013).
16. Cao, X., Pfaff, S. L. & Gage, F. H. YAP regulates neural progenitor cell number via the TEA domain transcription factor. *Genes & Development* **22**, 3320–3334 (2008).
17. Jursky, F. & Nelson, N. Developmental expression of the neurotransmitter transporter GAT3. *J. Neurosci. Res.* **55**, 394–399 (1999).
18. Chen, N.-H., Reith, M. E. A. & Quick, M. W. Synaptic uptake and beyond: the sodium- and chloride-dependent neurotransmitter transporter family SLC6. *Pflugers Arch.* **447**, 519–531 (2004).
19. Li, M.-Z. *et al.* Molecular mapping of developing dorsal horn-enriched genes by microarray and dorsal/ventral subtractive screening. *Developmental Biology* **292**, 555–564 (2006).
20. John, A. *et al.* Bcl11a is required for neuronal morphogenesis and sensory circuit formation in dorsal spinal cord development. *Development* **139**, 1831–1841 (2012).
21. Pillai, A., Mansouri, A., Behringer, R., Westphal, H. & Goulding, M. Lhx1 and Lhx5 maintain the inhibitory-neurotransmitter status of interneurons in the dorsal spinal cord. *Development* **134**,

- 357–366 (2007).
22. Huang, M. *et al.* Ptf1a, Lbx1 and Pax2 coordinate glycinergic and peptidergic transmitter phenotypes in dorsal spinal inhibitory neurons. *Developmental Biology* **322**, 394–405 (2008).
  23. Bröhl, D. *et al.* A transcriptional network coordinately determines transmitter and peptidergic fate in the dorsal spinal cord. *Developmental Biology* **322**, 381–393 (2008).
  24. Morikawa, Y., Hisaoka, T. & Senba, E. Characterization of Foxp2-expressing cells in the developing spinal cord. *NSC* **162**, 1150–1162 (2009).
  25. Rouso, D. L. *et al.* Foxp-Mediated Suppression of N-Cadherin Regulates Neuroepithelial Character and Progenitor Maintenance in the CNS. *Neuron* **74**, 314–330 (2012).
  26. Kinameri, E. *et al.* Prdm Proto-Oncogene Transcription Factor Family Expression and Interaction with the Notch-Hes Pathway in Mouse Neurogenesis. *PLoS ONE* **3**, e3859 (2008).
  27. Chang, J. C. *et al.* Prdm13 Mediates the Balance of Inhibitory and Excitatory Neurons in Somatosensory Circuits. *Developmental Cell* **25**, 182–195 (2013).
  28. Hanotel, J. *et al.* The Prdm13 histone methyltransferase encoding gene is a Ptf1a-Rbpj downstream target that suppresses glutamatergic and promotes GABAergic neuronal fate in the dorsal neural tube. *Developmental Biology* **386**, 340–357 (2014).
  29. Uchikawa, M., Kamachi, Y. & Kondoh, H. Two distinct subgroups of Group B Sox genes for transcriptional activators and repressors: their expression during embryonic organogenesis of the chicken. *Mech. Dev.* **84**, 103–120 (1999).
  30. Sandberg, M., Källström, M. & Muhr, J. Sox21 promotes the progression of vertebrate neurogenesis. *Nature Neuroscience* **8**, 995–1001 (2005).
  31. Müller, T. *et al.* The homeodomain factor lbx1 distinguishes two major programs of neuronal differentiation in the dorsal spinal cord. *Neuron* **34**, 551–562 (2002).
  32. Eng, S. R., Dykes, I. M., Lanier, J., Fedtsova, N. & Turner, E. E. POU-domain factor Brn3a regulates both distinct and common programs of gene expression in the spinal and trigeminal sensory ganglia. *Neural Dev* **2**, 3 (2007).
  33. Zou, M., Li, S., Klein, W. H. & Xiang, M. Brn3a/Pou4f1 regulates dorsal root ganglion sensory neuron specification and axonal projection into the spinal cord. *Developmental Biology* **364**, 114–127 (2012).
  34. Wine-Lee, L. Signaling through BMP type 1 receptors is required for development of interneuron cell types in the dorsal spinal cord. *Development* **131**, 5393–5403 (2004).
  35. Chi, S. W., Hannon, G. J. & Darnell, R. B. An alternative mode of microRNA target recognition. *Nature Structural & Molecular Biology* **19**, 321–327 (2012).
